# Supplementary material for: Glucocorticoid Receptor β Isoform Predominates in the Human Dysplastic Brain Region and Is Modulated by Age, Sex, and Antiseizure Medication
Source: MDPI journal article supplement (doi:10.3390/ijms23094940), 2022-04-29
Supplement: s1 [file s1]

## Supplementary Material

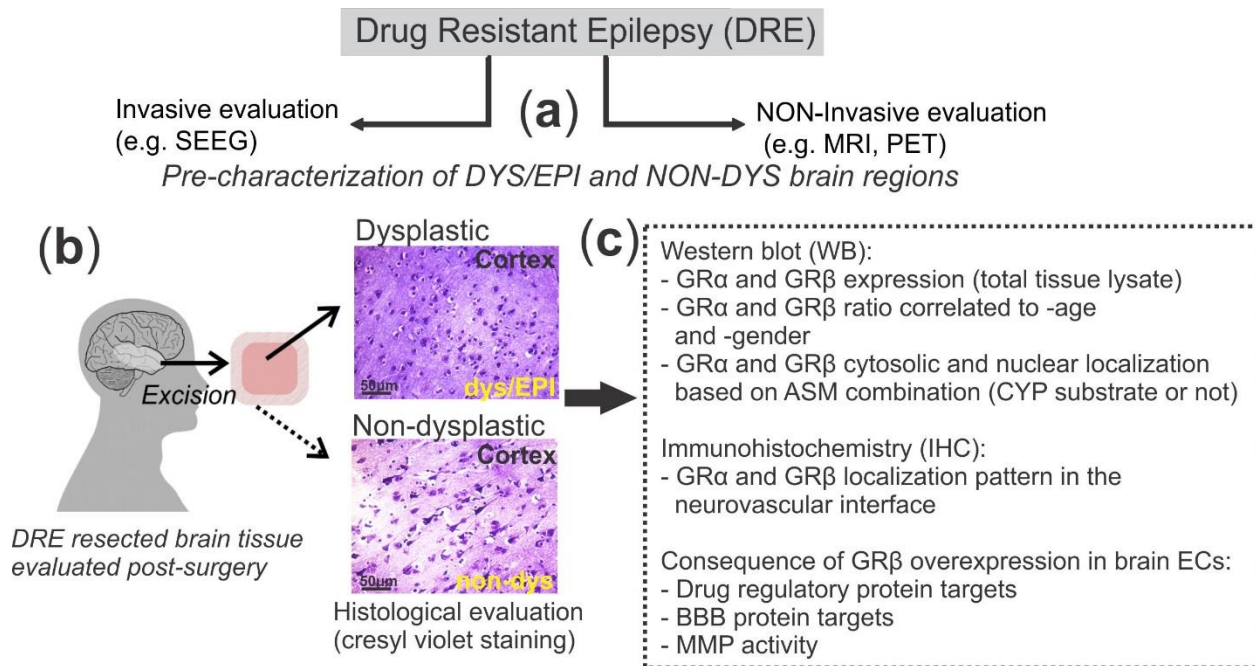

**Figure S1.** Experimental design. **(a)** The pre-operative characterization performed independently of the project by physicians allows for determination of dysplastic and non-dysplastic regions from the resected brain tissue. **(b)** These tissues were then characterized by histopathological staining post-resective surgery and were **(c)** used for evaluation of various endpoints for this study.

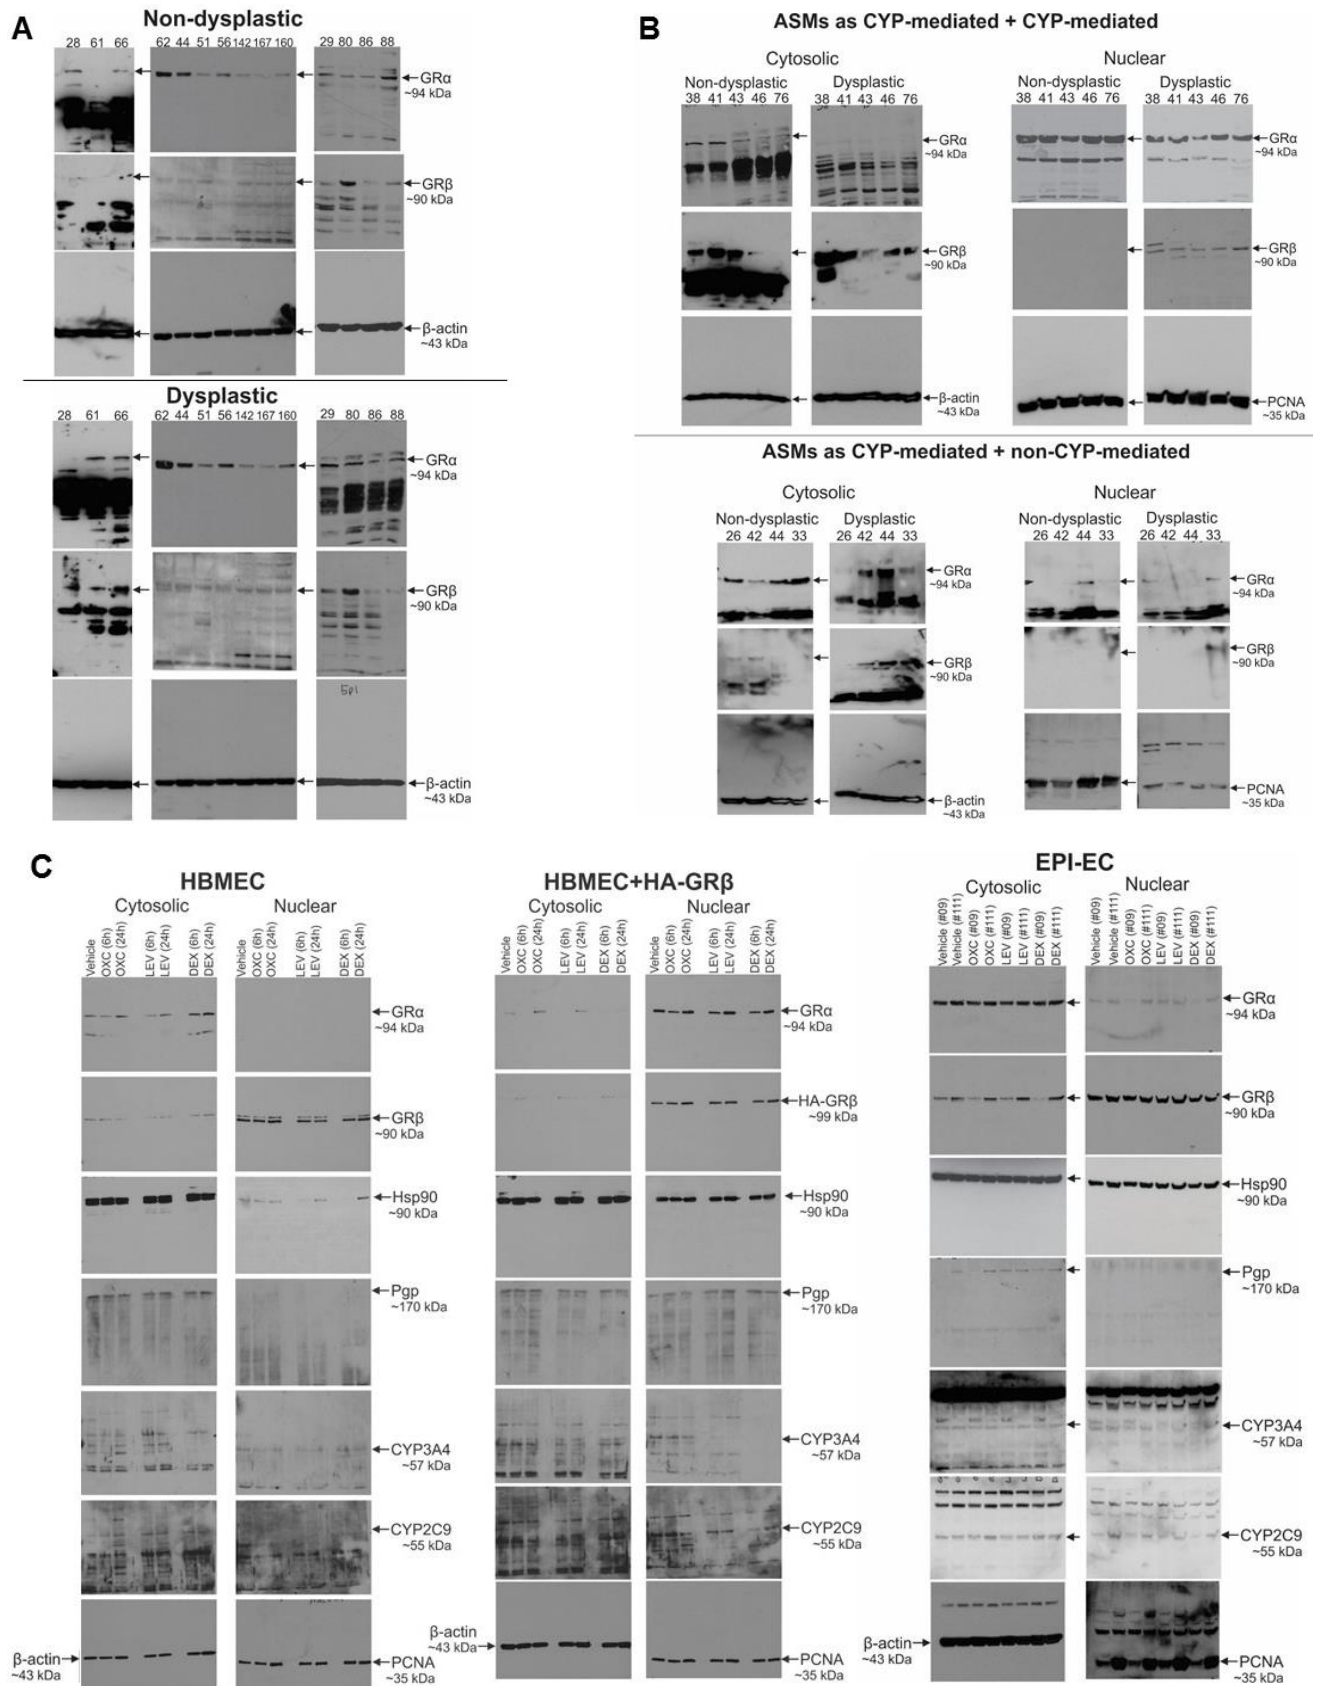

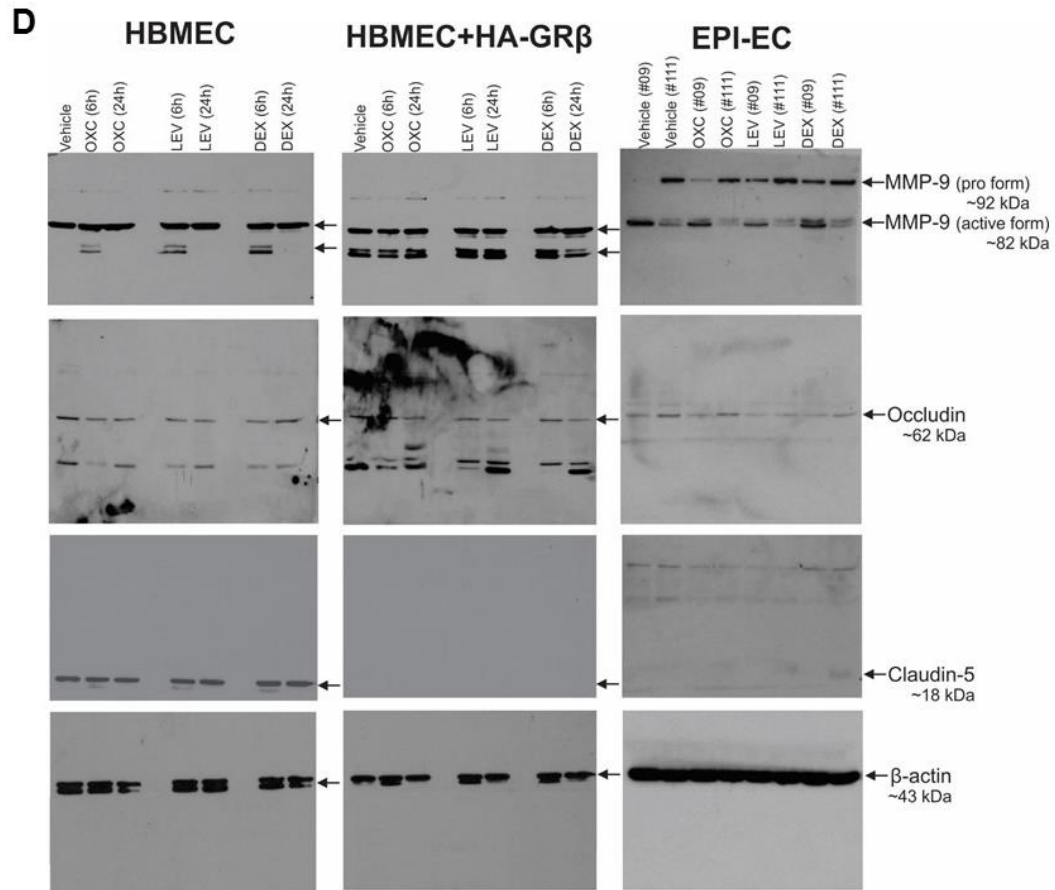

**Figure S2.** Full representative western blots.

**Table S1.** List of antibodies used for immunohistochemistry (IHC) and western blot (WB).**(a)**

| <b>Primary Antibody</b>         | <b>Host</b> | <b>Concentration</b>             | <b>Manufacturer</b>                                | <b>Catalog No.</b> |
|---------------------------------|-------------|----------------------------------|----------------------------------------------------|--------------------|
| <i>GR<math>\alpha</math></i>    | Rabbit      | WB: 4 $\mu$ g/10mL<br>IHC: 1:100 | Invitrogen, Thermo Fisher Scientific, Carlsbad, CA | PA1-516            |
| <i>GR<math>\beta</math></i>     | Rabbit      | WB: 1:250<br>IHC: 1:100          | Invitrogen, Thermo Fisher Scientific, Carlsbad, CA | PA3-514            |
| <i>Hsp90</i>                    | Mouse       | WB: 1:1500                       | Origene                                            | TA500494           |
| <i>MDR1/Pgp</i>                 | Mouse       | WB: 1:100                        | Calbiochem                                         | 517310             |
| <i>CYP3A4</i>                   | Rabbit      | WB: 1:800                        | Abcam                                              | ab3572             |
| <i>CYP2C9</i>                   | Rabbit      | WB: 1:100                        | Abgent                                             | AP7881c            |
| <i>MMP-9</i>                    | Mouse       | WB: 1:1000                       | Sigma-Aldrich, St. Louis, MO                       | SAB5200294         |
| <i>Claudin-5</i>                | Mouse       | WB: 1:500                        | Invitrogen, Thermo Fisher Scientific, Carlsbad, CA | 35-2500            |
| <i>Occludin</i>                 | Rabbit      | WB: 1:250                        | Invitrogen, Thermo Fisher Scientific, Carlsbad, CA | 71-1500            |
| <i>NeuN</i>                     | Mouse       | IHC: 1:500                       | MilliporeSigma, Burlington, MA                     | MAB377             |
| <i>GFAP</i>                     | Mouse       | IHC: 1:100                       | Sigma-Aldrich, St. Louis, MO                       | G3893              |
| <i><math>\beta</math>-actin</i> | Mouse       | WB: 1:10,000                     | Sigma-Aldrich, St. Louis, MO                       | A1978              |
| <i>PCNA</i>                     | Rabbit      | WB: 1:1000                       | Proteintech Group                                  | 10205-2-AP         |

**(b)**

| <b>Secondary Antibody</b>                               | <b>Concentration</b> | <b>Manufacturer</b>                               | <b>Catalog No.</b> |
|---------------------------------------------------------|----------------------|---------------------------------------------------|--------------------|
| <i>FITC Donkey <math>\alpha</math>-Rabbit</i>           | IHC: 1:100           | Jackson ImmunoResearch, West Grove, PA            | 711-C95-152        |
| <i>Alexa 594 Donkey <math>\alpha</math>-Mouse</i>       | IHC: 1:100           | Jackson ImmunoResearch                            | 715-585-150        |
| <i>Biotinylated Goat <math>\alpha</math>-Rabbit-IgG</i> | IHC: 1:200           | Vector Laboratories, Inc. Burlingame, CA          | BA-1000            |
| <i>Polyclonal Goat Anti-Rabbit IgG HRP</i>              | WB: 1:2500           | Dako, part of ThermoFisher Scientific Waltham, MA | P0448              |
| <i>Polyclonal Goat Anti-Mouse IgG HRP</i>               | WB: 1:2500           | Dako, part of ThermoFisher Scientific Waltham, MA | P0447              |
